# Supplementary material for: Urinary cell-free DNA is a versatile analyte for monitoring infections of the urinary tract
Source: Springer Nature journal article supplement (doi:10.1038/s41467-018-04745-0), 2018-06-14
Supplement: 41467_2018_4745_MOESM1_ESM.pdf [file 41467_2018_4745_MOESM1_ESM.pdf]

**Supplementary Information for:**

**Urinary cell-free DNA is a versatile analyte for monitoring infections of the urinary tract**

Burnham et al.

File includes:

Supplementary Figures 1-2

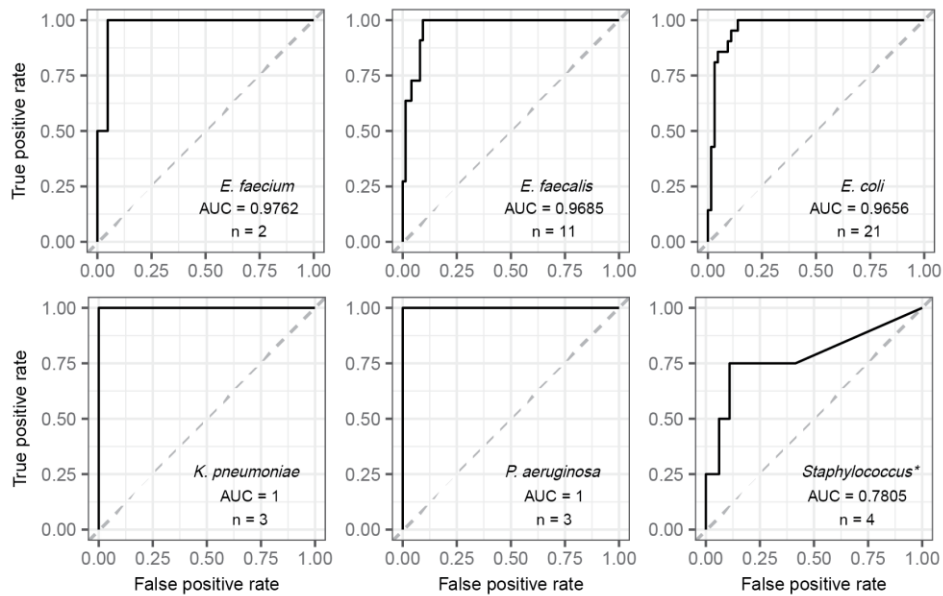

**Supplementary Figure 1: Analysis of performance of urinary cfDNA assay to identify bacterial UTI against conventional bacterial culture.** Receiver operating characteristic analyses of the performance of urinary cfDNA in identifying UTIs with the five suspected causative bacterial species and one suspected causative bacterial genus (marked with \*). Area under curve = AUC, n = number of positive cultures. Total number of samples consisted of those clinically determined to have UTI based on positive urine culture, and those negative for UTI based on a bacterial count of < 10,000 CFU/mL in bacterial culture (total  $n = 86$ ).

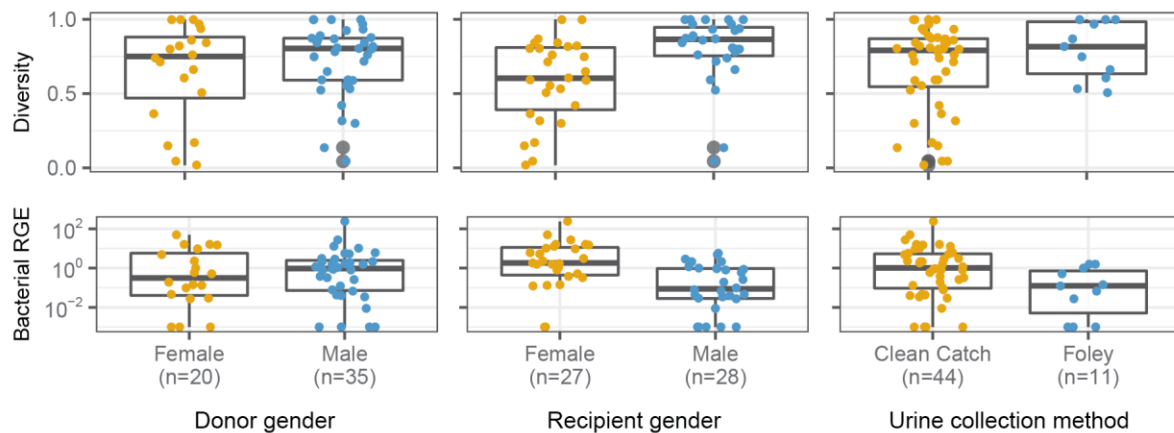

**Supplementary Figure 2: Species-level diversity (Simpson index) and total relative genome abundance (RGE) as function of gender and urine collection method.** The significance of clinical parameters on the bacteriome is tested using two-tailed Wilcoxon rank sum test for samples that were either UTI negative or taken within three days of transplantation ( $n = 55$ ): donor gender ( $p_{\text{diversity}} = 0.59$  and  $p_{\text{RGE}} = 0.75$ ), urine collection method ( $p_{\text{diversity}} = 0.26$  and  $p_{\text{RGE}} = 0.02$ ), and recipient gender ( $p_{\text{diversity}} = 1.7 \times 10^{-3}$  and  $p_{\text{RGE}} = 3.2 \times 10^{-4}$ ).
