# Supplementary material for: Urinary cell-free DNA is a versatile analyte for monitoring infections of the urinary tract
Source: Nat Commun. 2018 Jun 20;9:2412. doi: 10.1038/s41467-018-04745-0 (PMC6010457; doi:10.1038/s41467-018-04745-0)
Supplement: Supplementary file 10 — Supplementary Data 7 [file 41467_2018_4745_MOESM10_ESM.xlsx]

## Sheet: Fig3B
SAMPLE NAME	SAMPLE ID	STATUS	Genus	Species	Aligned Count	GINI index	Growth Score	Strength of Fit (R2)
GU1125	GEM-US-1125	UTI	Escherichia	coli	255342	0.182209	3.27227	0.985543
GU13	GEM-US-349	No UTI	Ureaplasma	parvum	18915	0.0998617	1.92882	0.952451
GU14	GEM-US-365	UTI	Raoultella	ornithinolytica	74006	0.194443	3.80801	0.982544
GU1423	GEM-US-1423	UTI	Escherichia	coli	4133	0.13424	2.351	0.99489
GU1495	GEM-US-1495	UTI	Escherichia	coli	546877	0.18738	3.18304	0.960031
GU1586	GEM-US-1586	Pre-UTI	Lactobacillus	rhamnosus	20791	0.169475	2.92942	0.971436
GU1586	GEM-US-1586	Pre-UTI	Ureaplasma	parvum	4308	0.0851984	1.76276	0.986291
GU19	GEM-US-597	UTI	Escherichia	coli	15187	0.172233	2.96126	0.989348
GU2	GEM-US-218	No UTI	Ureaplasma	parvum	20227	0.113161	2.11272	0.97229
GU2157	GEM-US-2157	UTI	Escherichia	coli	9684	0.158352	2.69944	0.993804
GU2300	GEM-US-2300	UTI	Corynebacterium	jeikeium	6332	0.195438	3.44437	0.97914
GU2300	GEM-US-2300	UTI	Escherichia	coli	9458	0.163039	2.79873	0.983142
GU2300	GEM-US-2300	UTI	Gardnerella	vaginalis	68810	0.106523	1.97182	0.987374
GU2460	GEM-US-2460	UTI	Escherichia	coli	9579	0.141737	2.39605	0.984843
GU2709	GEM-US-2709	UTI	Escherichia	coli	709936	0.141007	2.0943	0.935254
GU2709	GEM-US-2709	UTI	Gardnerella	vaginalis	42426	0.177273	3.0337	0.972779
GU3012	GEM-US-3012	UTI	Corynebacterium	jeikeium	3726	0.169529	2.74171	0.975392
GU31	GEM-US-1194	No UTI	Gardnerella	vaginalis	60861	0.164819	2.64036	0.974762
GU31	GEM-US-1194	No UTI	Propionibacterium	acnes	2741	0.0752967	1.61565	0.985452
GU34	GEM-US-1208	Pre-UTI	Gardnerella	vaginalis	28451	0.102785	1.78326	0.933284
GU38	GEM-US-740	UTI	Klebsiella	pneumoniae	3479	0.167245	2.81028	0.963624
GU3825	GEM-US-3825	UTI	Escherichia	coli	42934	0.137211	2.4398	0.996334
GU3825	GEM-US-3825	UTI	Klebsiella	pneumoniae	33769	0.196246	3.47074	0.980187
GU4446	GEM-US-4446	UTI	Enterococcus	faecalis	11711	0.118918	1.8718	0.946616
GU4446	GEM-US-4446	UTI	Escherichia	coli	38721	0.16592	2.75695	0.976421
GU4446	GEM-US-4446	UTI	Klebsiella	pneumoniae	3151	0.187638	2.48041	0.97688
GU4446	GEM-US-4446	UTI	Pseudomonas	aeruginosa	3794	0.0972897	1.79135	0.973106
GU454	GEM-US-454	UTI	Escherichia	coli	2880	0.145001	2.45325	0.986855
GU467	GEM-US-467	UTI	Klebsiella	pneumoniae	9283	0.126008	2.0652	0.918699
GU47	GEM-US-185	Pre-UTI	Escherichia	coli	10054	0.136559	2.46909	0.98818
GU47	GEM-US-185	Pre-UTI	Gardnerella	vaginalis	5931	0.136717	2.32627	0.961034
GU47	GEM-US-185	Pre-UTI	Staphylococcus	epidermidis	8940	0.0725418	1.57041	0.948014
GU49	GEM-US-675	UTI	Klebsiella	pneumoniae	715239	0.185598	3.26641	0.986407
GU5	GEM-US-259	UTI	Escherichia	coli	3868208	0.164207	2.77302	0.978999
GU50	GEM-US-720	Pre-UTI	Pseudomonas	aeruginosa	5659	0.100182	1.86048	0.979485
GU52	GEM-US-779	UTI	Gardnerella	vaginalis	2706	0.173147	2.72642	0.923245
GU52	GEM-US-779	UTI	Pseudomonas	aeruginosa	19282	0.0683091	1.48363	0.954082
GU53	GEM-US-784	UTI	Gardnerella	vaginalis	11478	0.167566	2.7451	0.973607
GU59	GEM-US-1946	Pre-UTI	Bifidobacterium	longum	30124	0.131652	2.11167	0.993402
GU62	GEM-US-409	UTI	Streptococcus	pneumoniae	7585	0.136344	2.08575	0.922406
GU63	GEM-US-942	UTI	Ureaplasma	parvum	3632	0.151078	2.64412	0.960319
GU64	GEM-US-1090	Pre-UTI	Gardnerella	vaginalis	339571	0.081428	1.71183	0.98686
GU64	GEM-US-1090	Pre-UTI	Propionibacterium	acnes	3779	0.0611811	1.49165	0.929977
GU65	GEM-US-1195	UTI	Escherichia	coli	1963540	0.16732	2.84508	0.981137
GU69	GEM-US-465	UTI	Escherichia	coli	80338	0.178297	2.89342	0.987721
GU69	GEM-US-465	UTI	Gardnerella	vaginalis	2604	0.10941	1.90317	0.901787
GU69	GEM-US-465	UTI	Streptococcus	pneumoniae	6196	0.139986	2.20866	0.951861
GU70	GEM-US-1052	UTI	Pseudomonas	aeruginosa	13028	0.0968549	1.81272	0.953793
GU70	GEM-US-1052	UTI	Ureaplasma	parvum	21567	0.098844	1.95145	0.99065
GU71	GEM-US-1146	UTI	Gardnerella	vaginalis	153659	0.0872072	1.75026	0.991301
GU73	GEM-US-1538	UTI	Ureaplasma	parvum	3676	0.0869361	1.74357	0.948909
GU75	GEM-US-1660	Pre-UTI	Lactobacillus	rhamnosus	79969	0.194041	3.48186	0.982694
GU75	GEM-US-1660	Pre-UTI	Ureaplasma	parvum	15940	0.0995625	1.8326	0.935396
GU77	GEM-US-859	UTI	Corynebacterium	jeikeium	7603	0.158886	2.70978	0.952516
GU77	GEM-US-859	UTI	Escherichia	coli	4957	0.152289	2.69255	0.99205
GU77	GEM-US-859	UTI	Gardnerella	vaginalis	41250	0.138472	2.26299	0.941392
GU79	GEM-US-1501	UTI	Corynebacterium	jeikeium	34525	0.196165	3.18104	0.965175
GU79	GEM-US-1501	UTI	Enterococcus	faecalis	9806	0.186394	3.23494	0.940762
GU79	GEM-US-1501	UTI	Staphylococcus	epidermidis	25911	0.0942919	1.69398	0.974967
GU82	GEM-US-1970	UTI	Bifidobacterium	longum	14459	0.123039	2.01275	0.971987
GU83	GEM-US-2089	UTI	Enterococcus	faecalis	22526	0.187195	2.83445	0.90996
GU9	GEM-US-384	UTI	Escherichia	coli	64432	0.090129	1.6952	0.903154
